# Supplementary material for: Zero-Field Splitting in Cyclic Molecular Magnet {Cr8Y8}: A High-Frequency ESR Study
Source: MDPI journal article supplement (doi:10.3390/magnetochemistry9020049), 2023-02-03
Supplement: s1 [file s1]

# Supplementary Materials: Zero-Field Splitting in Cyclic Molecular Magnet $\{\text{Cr}_8\text{Y}_8\}$ : a High-Frequency ESR Study

Zhendong Fu <sup>1</sup>, Zhong-Wen Ouyang <sup>2,\*</sup>, Qian-Cheng Luo <sup>3</sup>, Yan-Zhen Zheng <sup>3,\*</sup>, Wei Tong <sup>4</sup>, Huanpeng Bu <sup>1</sup>, Hanjie Guo <sup>1</sup> and Jin-Kui Zhao <sup>1,5</sup>

<sup>1</sup> Songshan Lake Materials Laboratory, Dongguan 523808, China

<sup>2</sup> Wuhan National High Magnetic Field Center, Huazhong University of Science and Technology, Wuhan 430074, China

<sup>3</sup> Frontier Institute of Science and Technology (FIST), State Key Laboratory for Mechanical Behavior of Materials, School of Chemistry and School of Physics, Xi'an Jiaotong University, Xi'an 710054, China

<sup>4</sup> Anhui Province Key Laboratory of Condensed Matter Physics at Extreme Conditions, High Magnetic Field Laboratory, Chinese Academy of Sciences, Hefei 230031, China

<sup>5</sup> Institute of Physics, Chinese Academy of Sciences, Beijing 100190, China

\* Correspondence: zhouyang@mail.hust.edu.cn (Z.-W.O.); zheng.yanzhen@xjtu.edu.cn (Y.-Z.Z.)

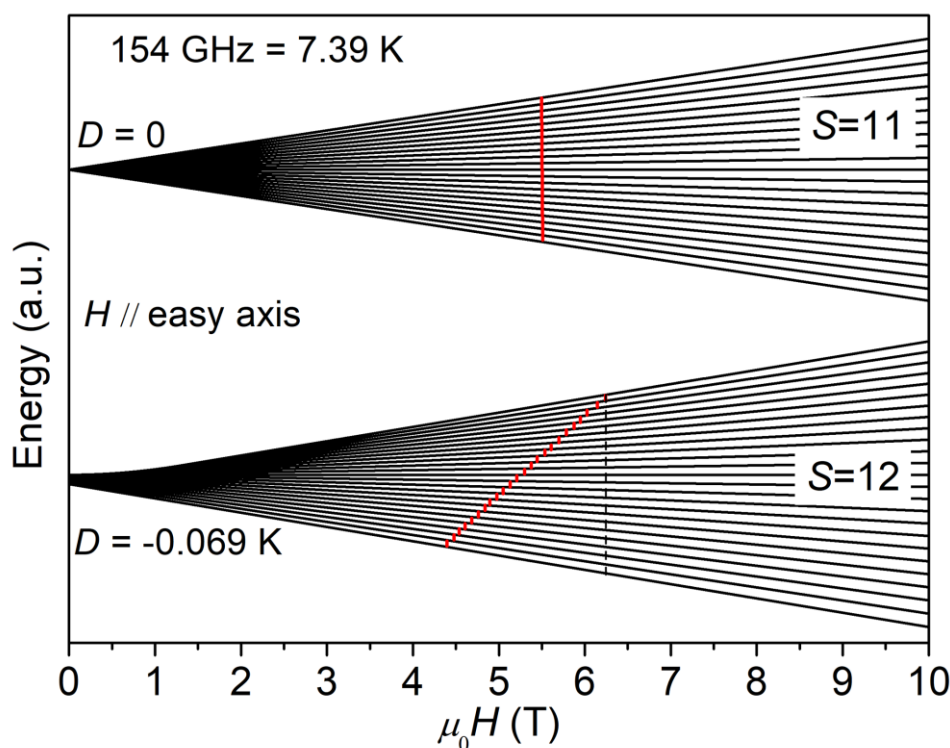

**Figure S1.** A Schematic representation of the energy levels for  $S = 11$  and  $S = 12$  as a function of magnetic field ( $H$ //easy axis). The allowed transitions for 154 GHz are marked with red arrows. The  $S = 11$  and  $S = 12$  levels are separated for the sake of clarity.
